# Supplementary material for: Psychological Impact of Exposure to the COVID-19 Sanitary Crisis on French Healthcare Workers: Risk Factors and Coping Strategies
Source: PubMed Central journal article supplement (PMC8637162; doi:10.3389/fpsyt.2021.701127), 2021-11-18
Supplement: Presentation_1.pdf [file Presentation_1.pdf]

**Supplementary Material 1.** Visual analogic scales measuring the effect of COVID-19 on mental health.

Please answer from 0 (minimum) to 10 (maximum)

| Theme                                                     | Questions                                                                     |
|-----------------------------------------------------------|-------------------------------------------------------------------------------|
| Worries for close relations' health                       | I worry for my close relations' health                                        |
| Fear of contaminate a close relation                      | I am scared of contaminating a close relation.                                |
| Worries for children's health                             | I worry for my children's health                                              |
| Fear of contaminating my children                         | I am scared of contaminating my children.                                     |
| Worries about watching children                           | I worry about my children watch.                                              |
| Powerlessness at work                                     | I feel powerless on my professional life (e.g. for my patients care)          |
| Powerlessness in the personal life                        | I feel powerless on my personal life (e.g. for protection close relations).   |
| Ethical dilemmas                                          | I had to make ethical dilemmas (e.g. choosing which patients to prioritize).  |
| Not answering patients demands                            | I had the feeling of not responding to my patients' demands.                  |
| Lack of material                                          | I missed protecting material at work.                                         |
| Setting close relation in danger                          | I feel guilty at my work about the crisis.                                    |
| Guilty at work                                            | I feel guilty at work.                                                        |
| Anger at work                                             | I feel angry at my work about the crisis.                                     |
| Increase anxiety                                          | Since the beginning of the crisis, I feel anxious.                            |
| Increase sadness                                          | Since the beginning of the crisis, I feel sad.                                |
| Sleep disturbance                                         | Since the beginning of the crisis, my sleep is significantly disturbed.       |
| Appetite disturbance                                      | Since the beginning of the crisis, my appetite is significantly disturbed.    |
| Feeling of regret                                         | I strongly feel regret.                                                       |
| Increase mistakes                                         | I have the feeling of making more mistakes since the beginning of the crisis. |
| Putting patients in danger                                | I think I put my patients' life in danger.                                    |
| Respect behavior toward patients                          | I think I behave respectfully toward my patients.                             |
| Exemplary behavior from colleagues                        | I think my colleagues' behavior has been exemplary.                           |
| Good reaction from the hospital                           | I think the hospital as reacted as best as possible.                          |
| Good material management from the hospital                | I think the hospital has well managed material.                               |
| Delay for information from state                          | I blame the state for the delay for information.                              |
| Poor management of the crisis from state                  | I think the state did not manage the crisis as well as possible.              |
| Non respect of quarantine                                 | I think citizens do not respect the instructions.                             |
| Guilty in the personal life                               | I feel guilty in my personal life about the crisis.                           |
| Self-blame for non-protection of close relations          | I blame myself for not being able to protect my close relations/my children.  |
| Blaming the state for lack of help for healthcare workers | I blame the state for doing nothing to help healthcare workers.               |
